# Supplementary material for: Continuous synthesis of 2,2,6,6-tetramethyl-4-piperidinol over CuCrSr/Al2O3: effect of Sr promoter
Source: Royal Society of Chemistry journal article supplement (doi:10.1039/d2ra08306j), 2023-01-01
Supplement: d2ra08306j2.pdf [file d2ra08306j2.pdf]

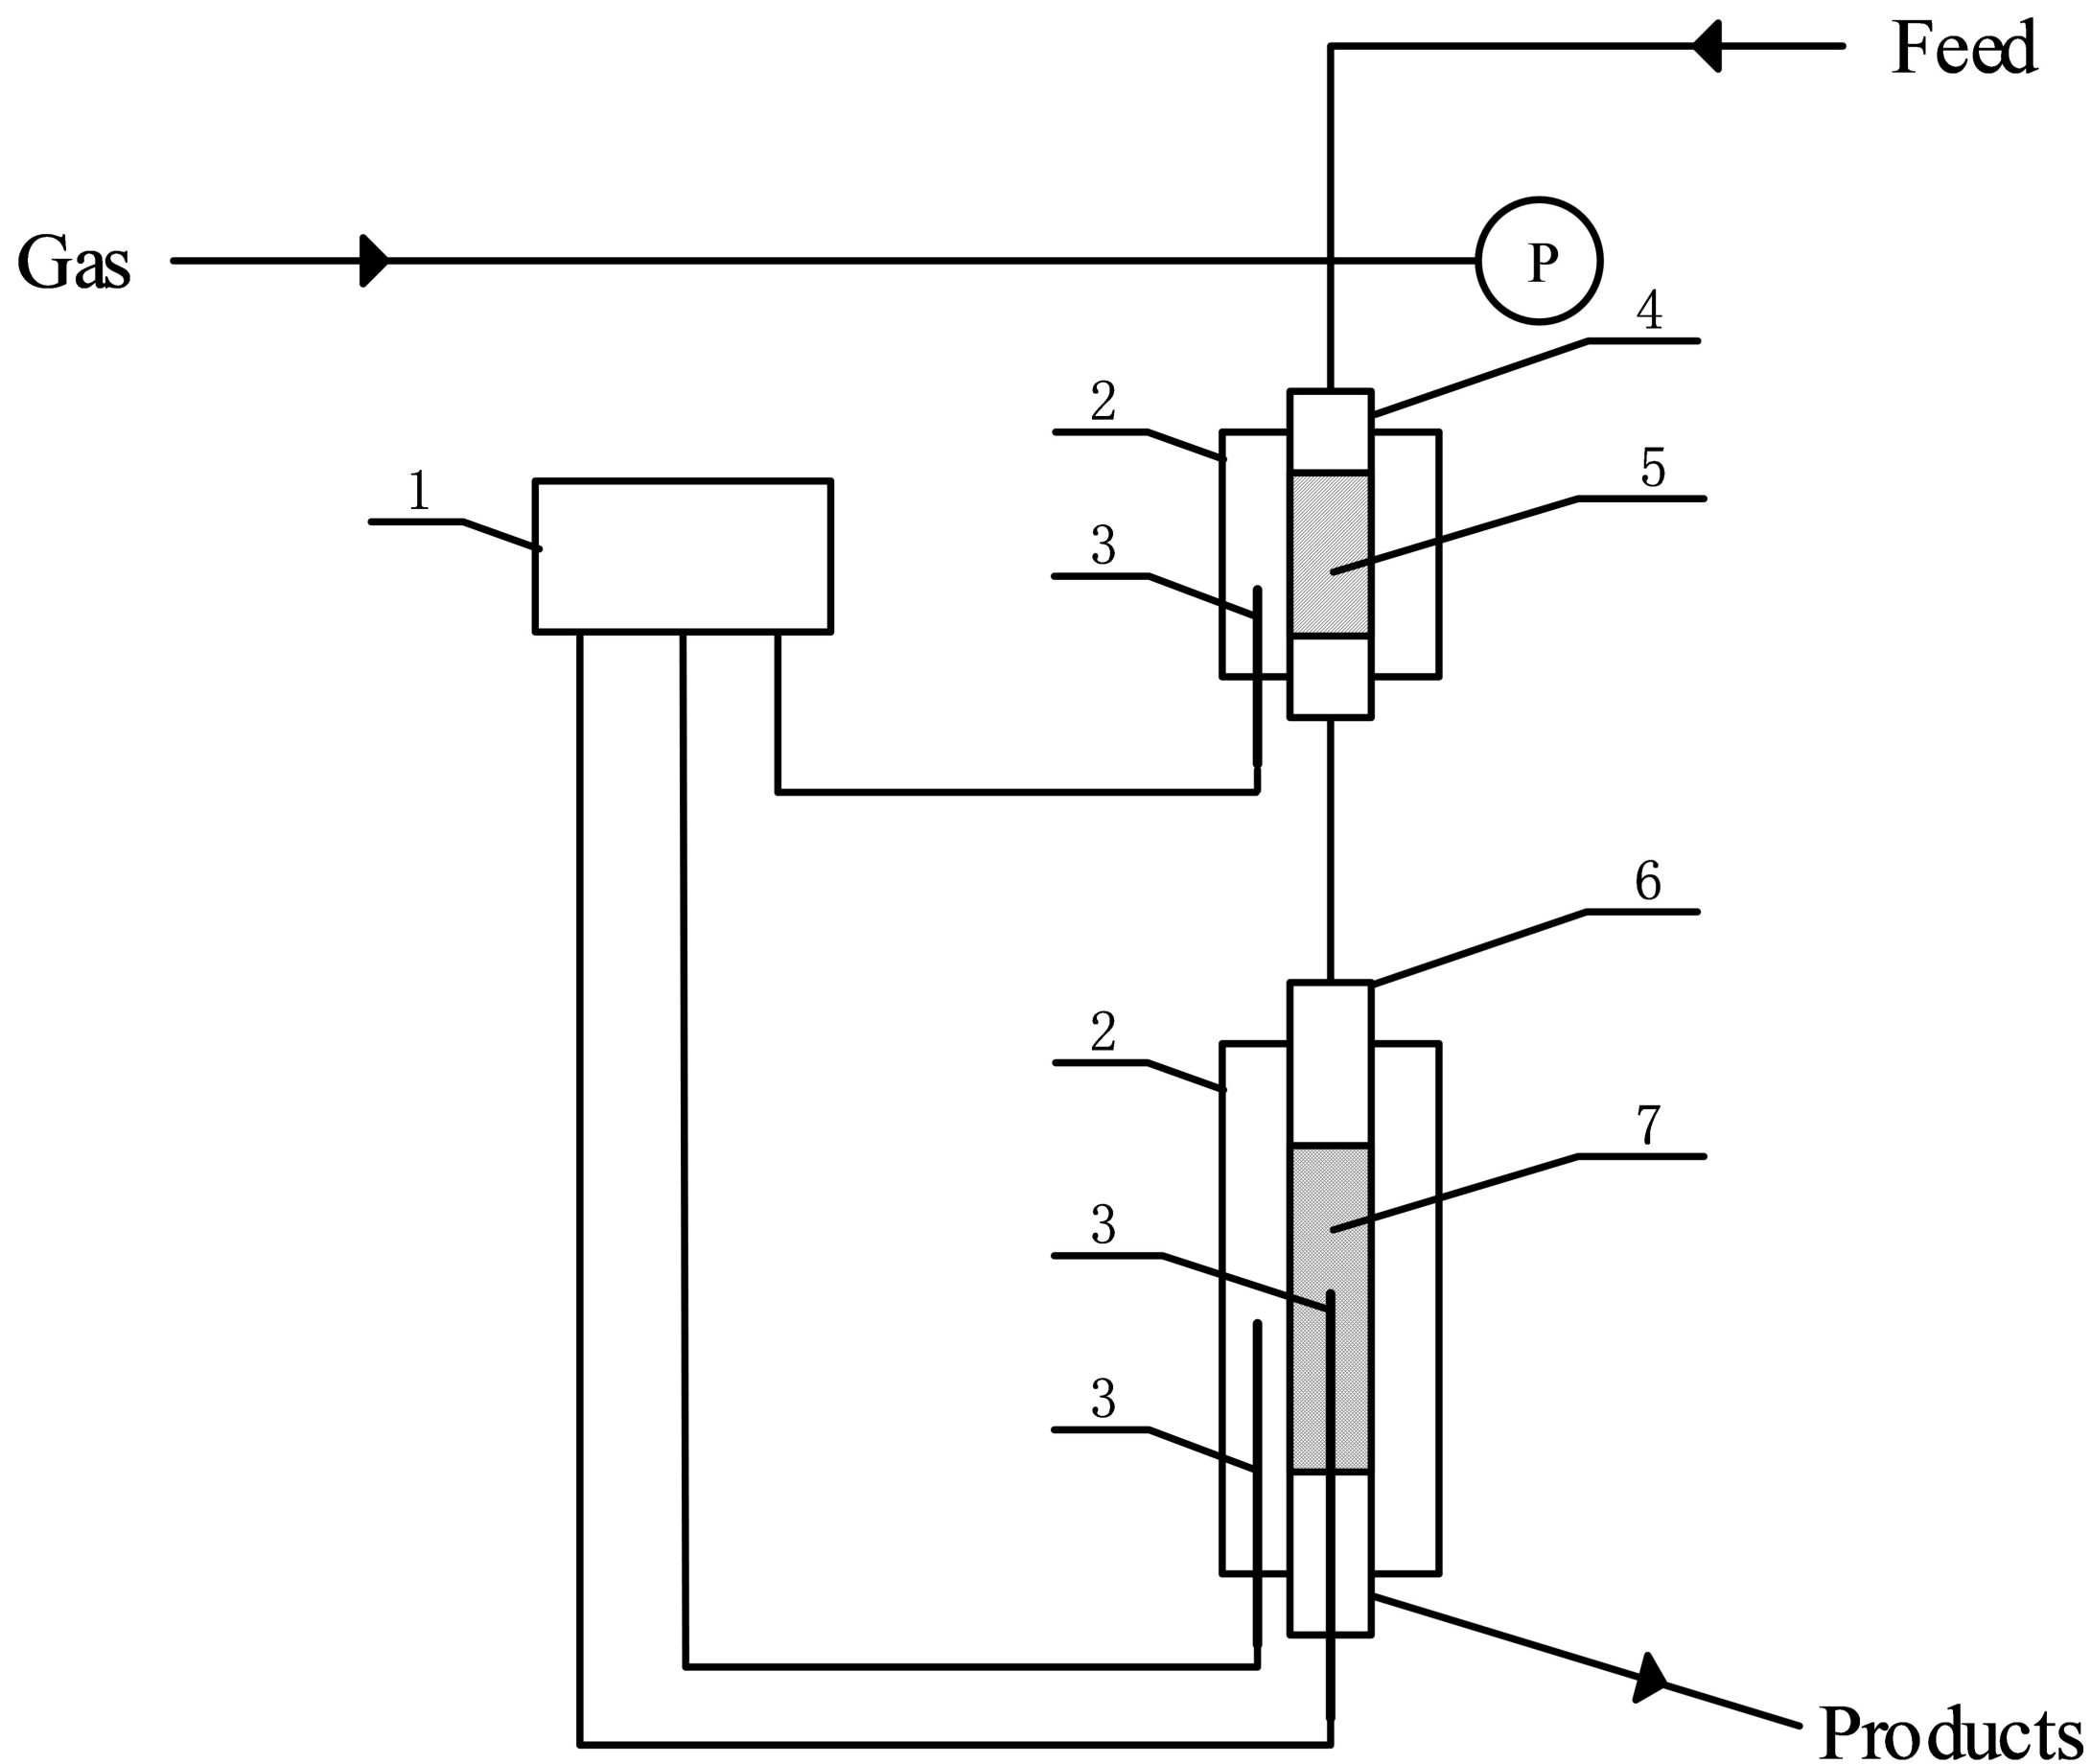

1. PID temperature controller, 2. Electrical heating, 3. Thermocouple, 4. Feed preheater, 5. Packing, 6. Fixed-bed reactor, 7. Catalyst
