# Supplementary material for: Continuous synthesis of 2,2,6,6-tetramethyl-4-piperidinol over CuCrSr/Al2O3: effect of Sr promoter
Source: Royal Society of Chemistry journal article supplement (doi:10.1039/d2ra08306j), 2023-01-01
Supplement: d2ra08306j5.pdf [file d2ra08306j5.pdf]

## Supporting Information

### Continuous synthesis of 2,2,6,6-tetramethyl-4-piperidinol over CuCrSr/Al<sub>2</sub>O<sub>3</sub>: Effect of Sr promoter

Zijing Zhang,<sup>†a,b,c,d</sup> Xi Chen,<sup>†e</sup> Bowei Wang,<sup>\*a,b,c,d</sup> Long Wang,<sup>a</sup> Yang Li,<sup>a,c,d</sup>  
Xilong Yan,<sup>a,c,d</sup> and Ligong Chen<sup>\*a,b,c,d</sup>

<sup>a</sup> School of Chemical Engineering and Technology, Tianjin University, Tianjin 300350, P. R. China.

<sup>b</sup> Zhejiang Institute of Tianjin University, Shaoxing, Zhejiang 312300, P. R. China.

<sup>c</sup> Tianjin Engineering Research Center of Functional Fine Chemicals, Tianjin, P. R. China.

<sup>d</sup> Guangdong Laboratory of Chemistry and Fine Chemical Industry Jiayang Center, Guangdong Province 522000, P. R. China

<sup>e</sup> Institute of Pharmaceutical Sciences, China Pharmaceutical University, Nanjing 210009, P. R. China.

**Section 1. Schematic diagram of catalytic performance evaluation apparatus**

**Section 2. N<sub>2</sub> adsorption-desorption isotherms and pore diameter of catalysts**

**Section 3. XRD patterns and TEM image of catalysts after stability experiment**

**Section 4. Numerical results of fitting peaks in Cu LMM spectra**

**Section 5. Texture and structural properties of Cu-based catalysts**

## Section 1. Schematic diagram of catalytic performance evaluation apparatus

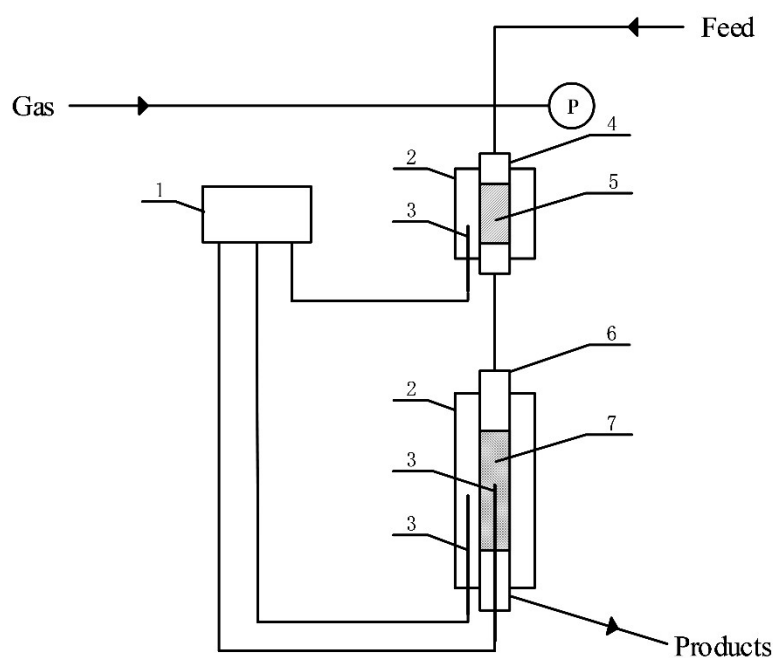

1.PID temperature controller, 2.Electrical heating, 3.Thermocouple, 4.Feed preheater, 5.Packing, 6.Fixed-bed reactor, 7.Catalyst

Fig.S1. Schematic diagram of catalytic performance evaluation apparatus

## Section 2. N<sub>2</sub> adsorption-desorption isotherms and pore diameter of catalysts

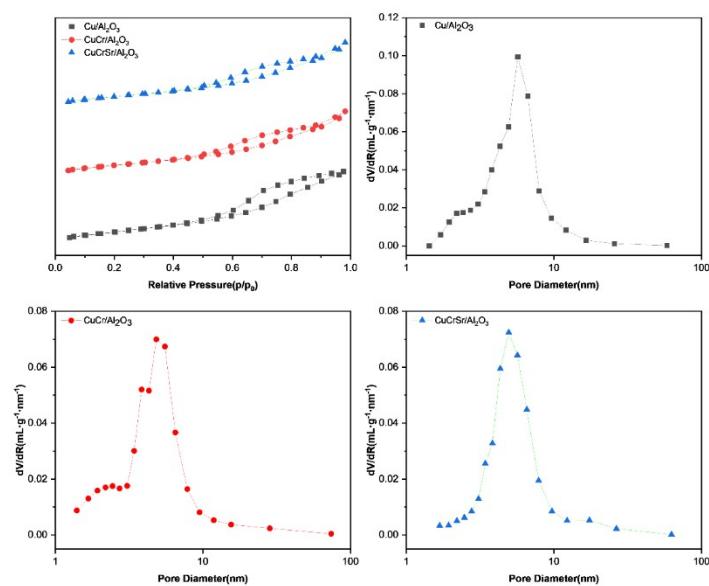

Fig.S2. N<sub>2</sub> adsorption-desorption isotherms and pore diameter of Cu-based catalysts

### Section 3. XRD patterns and TEM image of catalysts after stability experiment

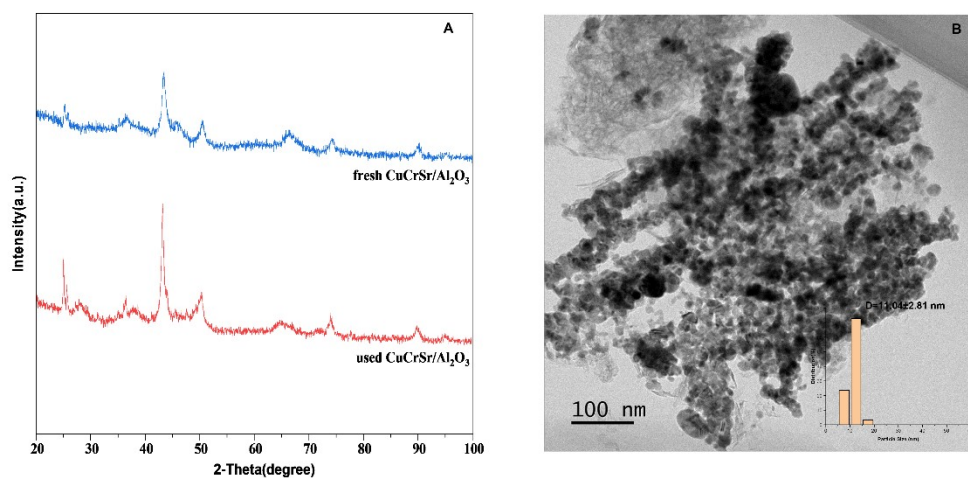

Fig.S3. XRD patterns (A) and TEM image (B) of CuCrSr/Al<sub>2</sub>O<sub>3</sub> after stability experiment

### Section 4. Numerical results of fitting peaks in Cu LMM spectra

Table S1. Numerical results of fitting peaks in Cu LMM spectra.

| Catalysts                             | $X_{\text{Cu}^+}/(\text{Cu}^0 + \text{Cu}^+)$ (%) |
|---------------------------------------|---------------------------------------------------|
| Cu/Al <sub>2</sub> O <sub>3</sub>     | 40.78                                             |
| CuCr/Al <sub>2</sub> O <sub>3</sub>   | 46.23                                             |
| CuCrSr/Al <sub>2</sub> O <sub>3</sub> | 58.48                                             |

## Section 5. Texture and structural properties of Cu-based catalysts

Table S2. Texture and structural properties of Cu-based catalysts.

| Catalysts                             | Cu <sup>a</sup><br>(wt.%) | Cr <sup>a</sup><br>(wt.%) | Sr <sup>a</sup><br>(wt.%) | S <sub>BET</sub> <sup>b</sup><br>(m <sup>2</sup> ·g <sup>-1</sup> ) | V <sub>pore</sub> <sup>b</sup><br>(cm <sup>3</sup> ·g <sup>-1</sup> ) | D <sub>pore</sub> <sup>b</sup><br>(nm) | Acidic sites concentration <sup>c</sup> (mmol/g) |          |        |       | d <sub>XRD</sub> <sup>d</sup><br>(nm) | d <sub>TEM</sub> <sup>e</sup><br>(nm) |
|---------------------------------------|---------------------------|---------------------------|---------------------------|---------------------------------------------------------------------|-----------------------------------------------------------------------|----------------------------------------|--------------------------------------------------|----------|--------|-------|---------------------------------------|---------------------------------------|
|                                       |                           |                           |                           |                                                                     |                                                                       |                                        | Weak                                             | M-strong | Strong | Total |                                       |                                       |
| Cu/Al <sub>2</sub> O <sub>3</sub>     | 20.53                     | -                         | -                         | 230.96                                                              | 0.433                                                                 | 5.688                                  | 0.38                                             | 0.73     | 1.44   | 2.55  | 19.5                                  | 25.76                                 |
| CuCr/Al <sub>2</sub> O <sub>3</sub>   | 18.57                     | 4.43                      | -                         | 198.86                                                              | 0.383                                                                 | 4.955                                  | 0.35                                             | 0.86     | 1.02   | 2.23  | 17.1                                  | 23.71                                 |
| CuCrSr/Al <sub>2</sub> O <sub>3</sub> | 20.00                     | 4.64                      | 4.47                      | 179.89                                                              | 0.351                                                                 | 4.945                                  | 0.28                                             | 0.42     | 1.21   | 1.91  | 9.5                                   | 9.43                                  |

<sup>a</sup> Loading amounts were determined by ICP-OES;

<sup>b</sup> the specific surface area, pore volumes and pore sizes were calculated according to BET equation;

<sup>c</sup> determined by NH<sub>3</sub>-TPD;

<sup>d</sup> determined by Debye-Scherrer equation;

<sup>e</sup> determined by TEM.
