# Supplementary figures and images for: Continuous synthesis of 2,2,6,6-tetramethyl-4-piperidinol over CuCrSr/Al2O3: effect of Sr promoter
Source: Royal Society of Chemistry journal article supplement (doi:10.1039/d2ra08306j), 2023-01-01

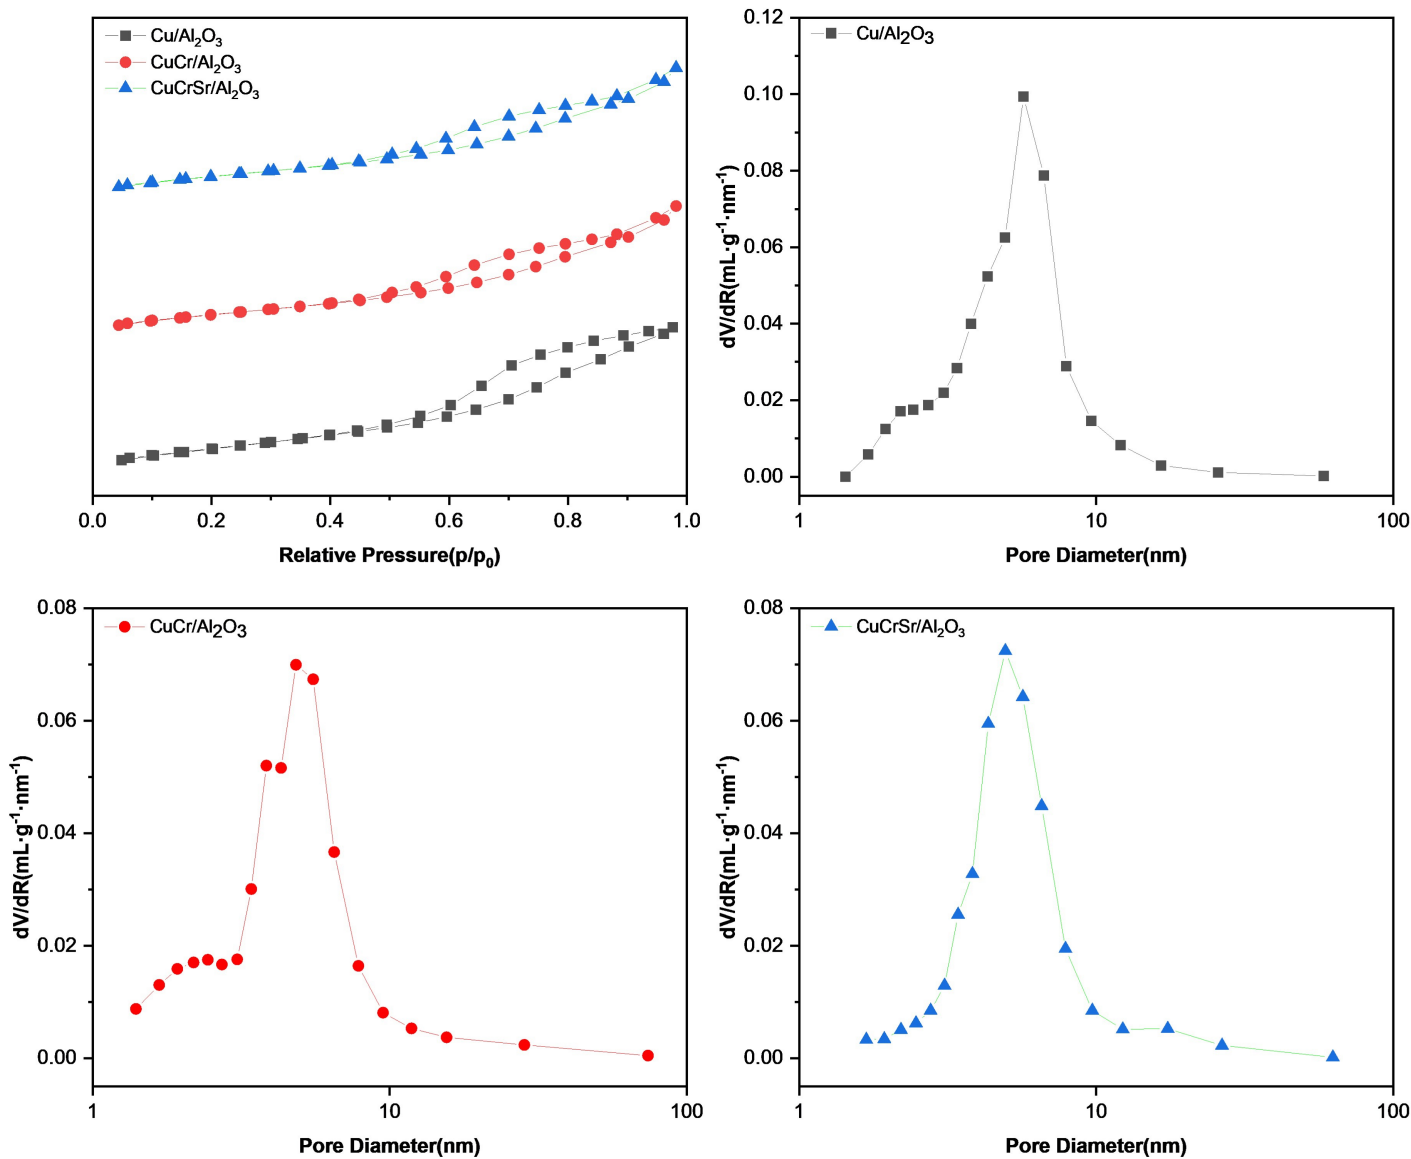

Supplement: d2ra08306j3.pdf [file d2ra08306j3.pdf]

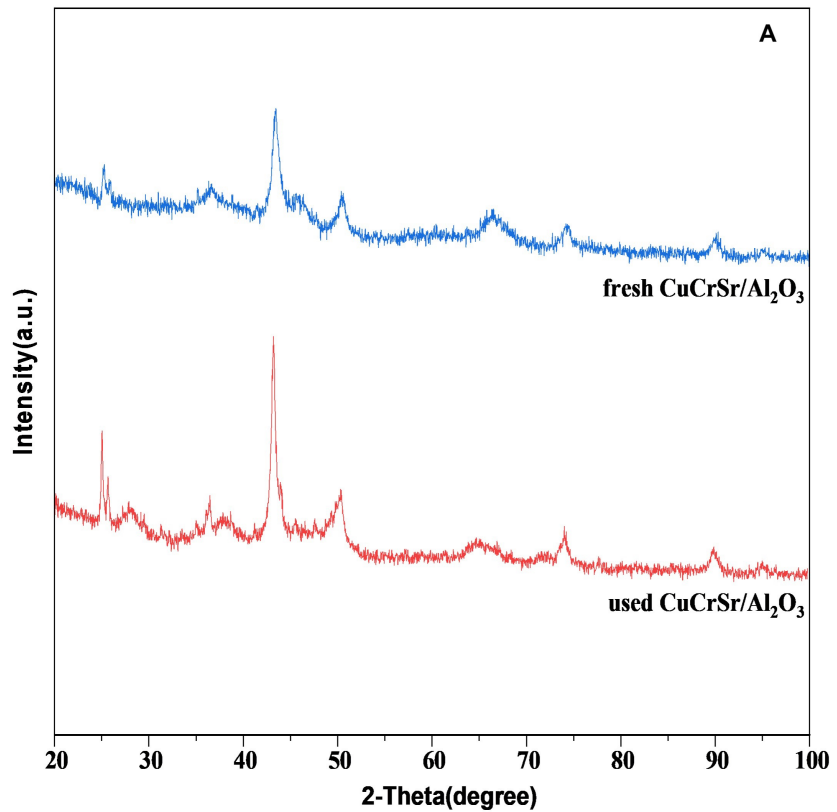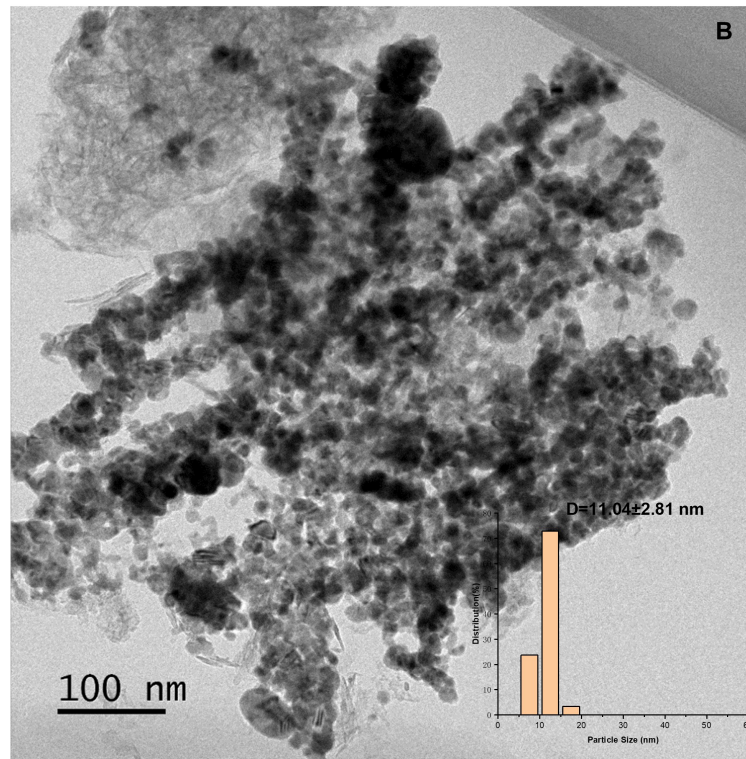

Supplement: d2ra08306j4.pdf [file d2ra08306j4.pdf]
